# Supplementary material for: Altered Volume, Morphology and Composition of the Pancreas in Type 2 Diabetes
Source: PLoS One. 2015 May 7;10(5):e0126825. doi: 10.1371/journal.pone.0126825 (PMC4423920; doi:10.1371/journal.pone.0126825)
Supplement: S1 Data — (XLSX) [file pone.0126825.s001.xlsx]

## Sheet: T2DM
	subject	Pancreas Volume	Pancreas triglyceride	Irregularity score
	1	99.65	4.99	2
	2	54.42	7.25	3
	3	44.81	4.45	3
	4	67.75	3.31	2
	5	75.33	3.59	4
	6	69.35	5.45	3
	7	49.6		3
	8	47.48	6.16	5
	9	42	4.04	5
	10	59.19	4.44	5
	11	20.83	5.38	3
	12	36.11	4.29	4
	13	77.45	4.47	5
	14	65.43	4.39	5
	15	27.41	2.83	5
	16	53.59	5.31	1
	17	42.02	3.2	3
	18	52.98	5.58	1
	19	55.87	6.58	5
	20	47.96	6.89	4
	21	49.36	6.9	4
	22	58.61	4.881	3
	23	74.48	6.05	4
	24	33.9	3.005	3
	25	48.21	4.523	5
	26	62	6.33	2
	27	55.78	5.69	3
	28	74.85	10.3	4
	29	84.67	5.73	4
	30	30.33	5.44	5
	31	21.37	10.37	4
	32	27.49	5.06	5
	33	66.46	5.2	3
	34	82.49	6.49	3
	35	54.65	4.04	3
	36	67.36	5.06	4
	37	48.48	4.05	2
	38	85.42	8.72	1
	39	54.47	6.27	2
	40	59.5	2.62	4
	41	45.34	5.7	3

## Sheet: control
Subject		Panc vol	PANC FAT	ratings
1		60.12	7.02	3
2		87.74	3.87	5
3		61.85	5.92	4
4		97.73	3.29	5
5		109.88	2.48	5
6		77.93	3.61	5
7		124.24	4.39	5
8		89.5	4.13	4
9		75.99	3.83	4
10		82.44	3.7	5
11		68.97	4.14	5
12		73.21	8.35	4
13		77.52	3.36	5
14		69.17	2.85	5
